# Supplementary material for: Thermoelectrochemistry-enabled phase and morphology control of metal phosphide nanocrystals
Source: Royal Society of Chemistry journal article supplement (doi:10.1039/d5nr04780c), 2026-01-01
Supplement: d5nr04780c1.pdf [file d5nr04780c1.pdf]

**Supporting Information For:**  
**Thermoelectrochemistry-Enabled phase and morphology control of  
metal phosphide nanocrystals**

Hyokyum Ahn,<sup>a</sup> Yunwoo Nam,<sup>a</sup> Taeyeon Kang,<sup>a</sup> Hyun S. Ahn<sup>\*a</sup>

<sup>a</sup> *Department of Chemistry, Yonsei University, Seoul, 03722, Republic of Korea*

E-mail: ahnhs@yonsei.ac.kr

| <b>Table of Contents</b>                                                                           | <b>Page</b> |
|----------------------------------------------------------------------------------------------------|-------------|
| Possible Electrochemical deposition process                                                        | S2          |
| Phosphorus Ratio-Dependent Morphology Evolution of Co–P Nanostructures<br>( <b>Figure S1</b> )     | S3          |
| EDS atomic Ratio of Co–P Nanostructures for Fig. S1 ( <b>Table S1</b> )                            | S4          |
| EDS Verified Phosphorus Content and in Co–P Nanostructures ( <b>Figure S2</b> )                    | S5          |
| EDS atomic Ratio for Fig.S2 ( <b>Table S2</b> )                                                    | S5          |
| Non heated Polycrystalline Cobalt Phosphide ( <b>Figure S3</b> )                                   | S6          |
| EDS mapping for Fig. 2d ( <b>Figure S4</b> )                                                       | S7          |
| Effect of Step Potential on Co <sub>2</sub> P Morphology and Etching Behavior ( <b>Figure S5</b> ) | S8          |
| Nickel Phosphide Morphologies and Corresponding SAED Patterns ( <b>Figure S6</b> )                 | S9          |
| ECSA double layer at H <sub>2</sub> SO <sub>4</sub> ( <b>Figure S7</b> )                           | S10         |
| ECSA double layer at KOH ( <b>Figure S8</b> )                                                      | S11         |
| Reference                                                                                          | S12         |

**Possible Electrochemical deposition process.** The electrochemical deposition process of metal phosphides is reported to proceed via the following mechanism, as demonstrated in previous studies.<sup>1,2,3</sup>

**Pathway 1: Direct phosphide formation via phosphine**

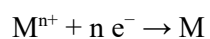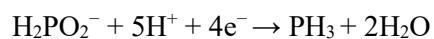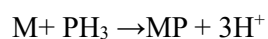

**Pathway 2: Sequential phosphorus reduction and alloy formation**

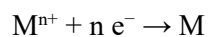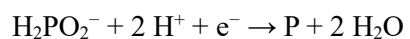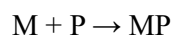

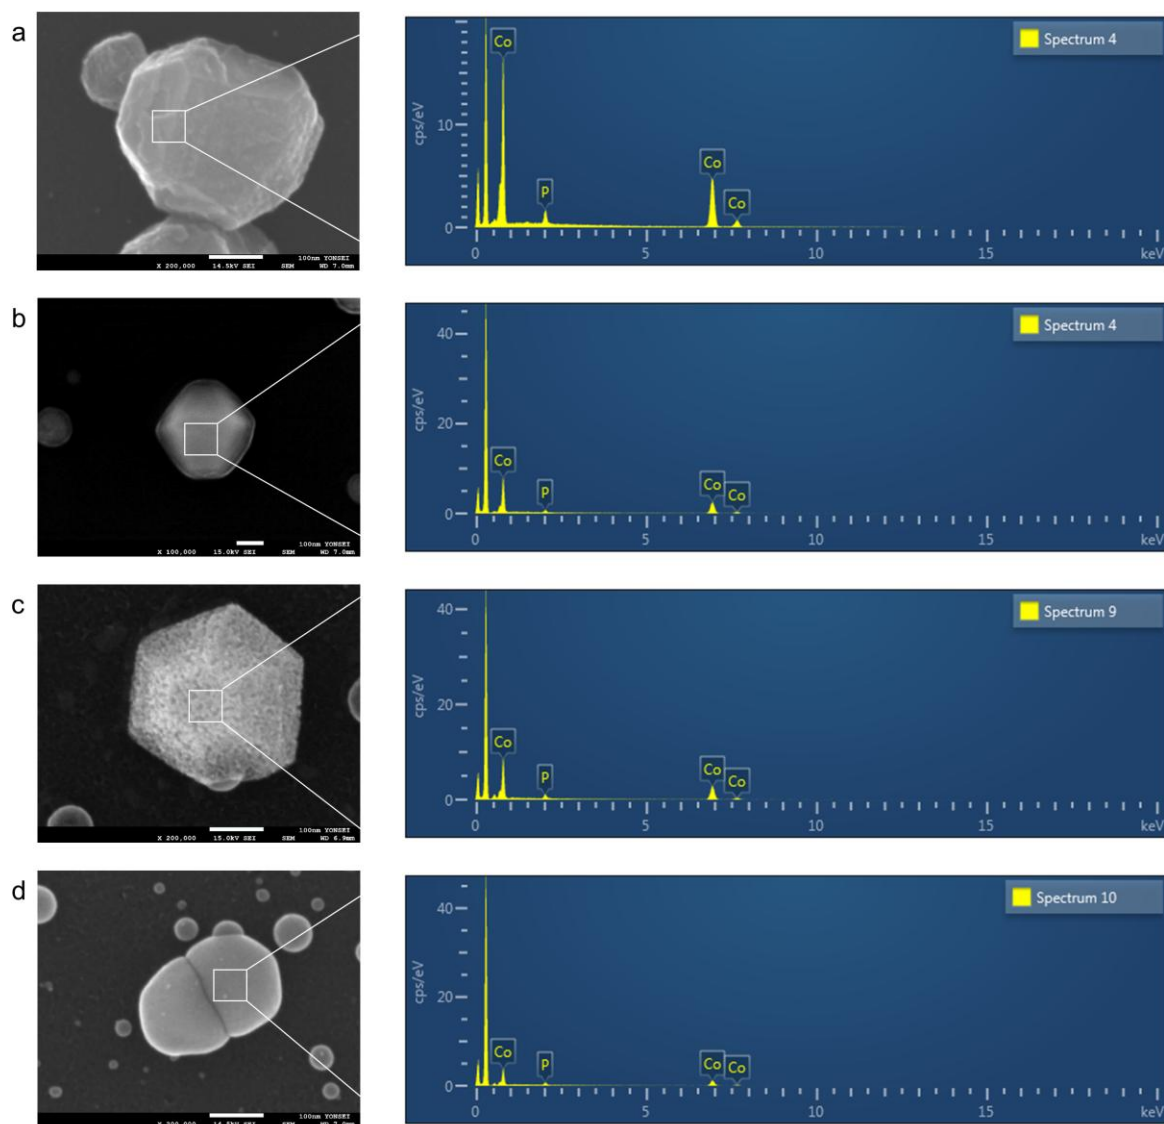

**Figure. S1:** Experimental results were obtained by systematically increasing the phosphorus precursor ratio under varied solution conditions, with the potential fixed at  $-1.15$  V and heating applied for 100 seconds. The precursor ratios for cobalt and phosphorus from samples a to d were as follows: 10 mM: 100 mM, 10 mM: 500 mM, 10 mM: 1 M, and 10 mM: 5 M, respectively. Energy-dispersive X-ray spectroscopy (EDS) analysis of the corresponding particles is summarized in Table S1, showing the atomic percentages of cobalt and phosphorus present in each sample.

| Element<br>Atomic % | Fig. S1a | Fig. S1b | Fig. S1c | Fig. S1d |
|---------------------|----------|----------|----------|----------|
| P                   | 2.26     | 5.73     | 8.38     | 11.41    |
| Co                  | 97.74    | 94.27    | 91.62    | 88.59    |
| Total:              | 100.00   | 100.00   | 100.00   | 100.00   |

**Table S1.** At lower phosphorus incorporation (Fig. S1a-c 2.26–8.38 at.% P), the resulting structures predominantly exhibited truncated hexagonal pyramid morphologies, indicative of phosphorus incorporation into the cobalt crystal lattice without disrupting its long-range order. But further increased phosphorus incorporation (Fig. S1d: >10 at.% P) led to a consistent transition towards amorphous morphologies. This behavior suggests a critical phosphorus loading threshold (~10 atomic %) above which crystalline Co–P nanostructures lose their ordered lattice and become amorphous.

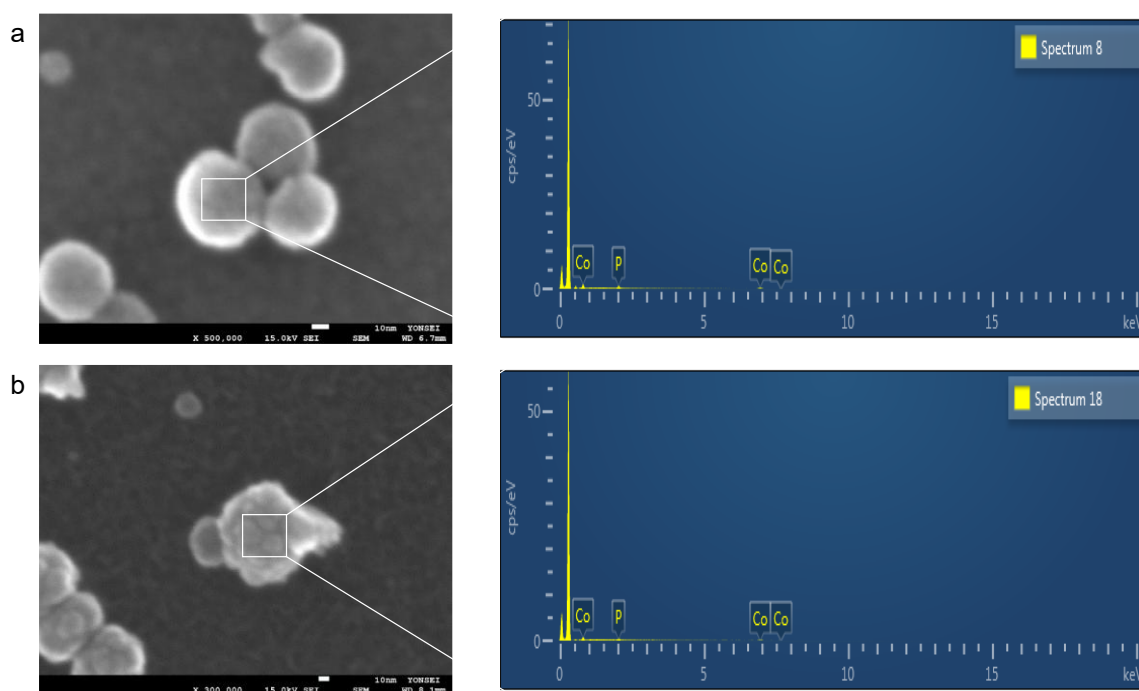

**Figure S2.** (a) (a) was prepared following the Figure S1 protocol, with solution conditions of 0.1 mM Co and 5 M phosphorus precursor. (b) synthesized via linear sweep voltammetry (LSV), shows polycrystalline regions. Energy-dispersive X-ray spectroscopy (EDS) analysis of the corresponding particles is summarized in Table S2, showing the atomic percentages of cobalt and phosphorus present in each sample.

| Element<br>Atomic % | Fig. S2a | Fig. S2b |
|---------------------|----------|----------|
| P                   | 34.85    | 33.99    |
| Co                  | 65.15    | 66.01    |
| Total:              | 100.00   | 100.00   |

**Table S2.** EDS Atomic percentage of cobalt and phosphorus present in each sample.

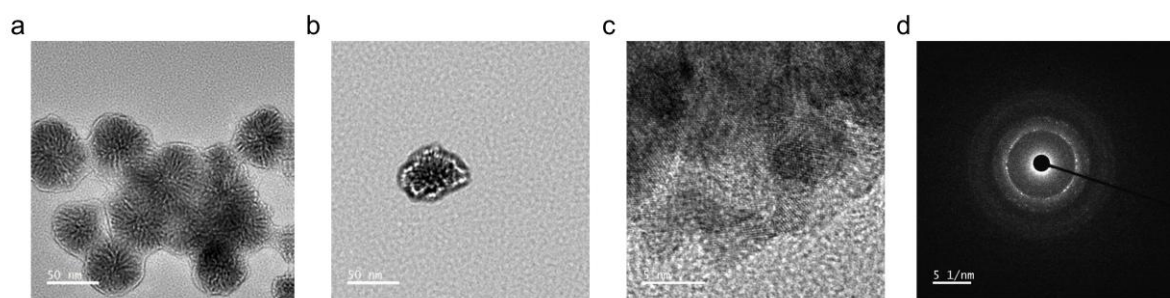

**Figure S3.** (a)~(d) When temperature conditions are excluded during the synthesis phase, samples synthesized under otherwise identical conditions consistently exhibit polycrystalline morphologies.

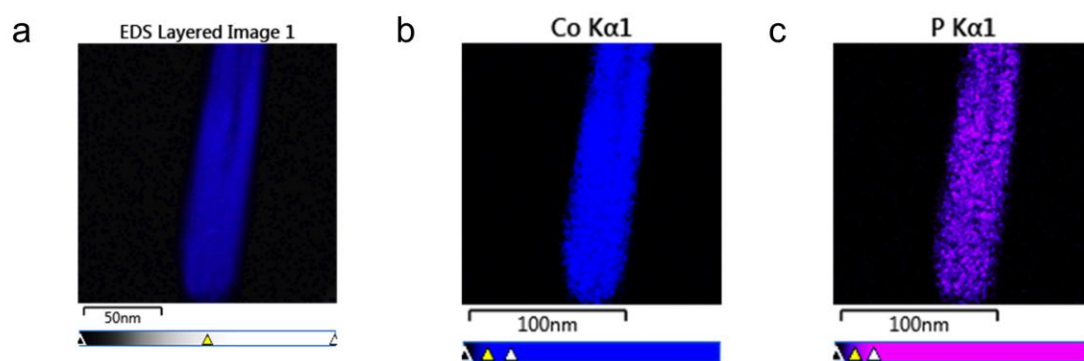

**Figure S4.** EDS Mapping for Fig 1.d (a) Total map (b) Co (c) P

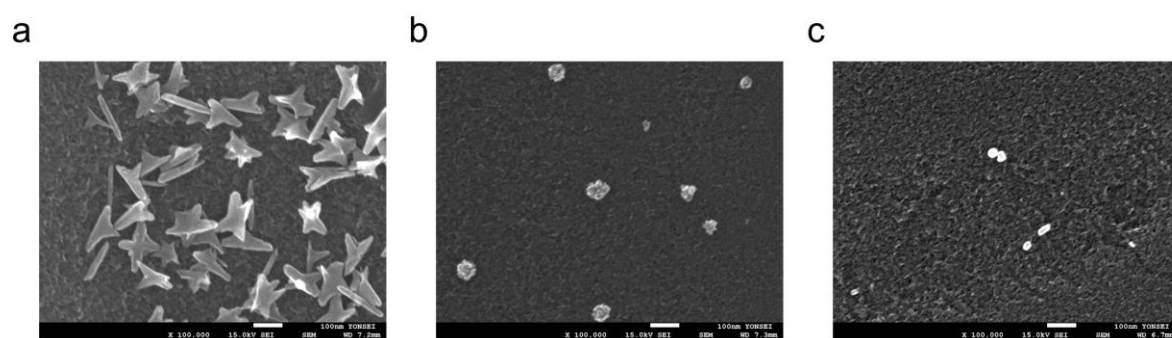

**Figure S5.** All samples were synthesized according to the protocol described for Fig. 2, with the applied step potential (E step) systematically varied as follows: (a)  $-1.05$  V; (b):  $-1.03$  V; (c) :  $-0.9$  V.



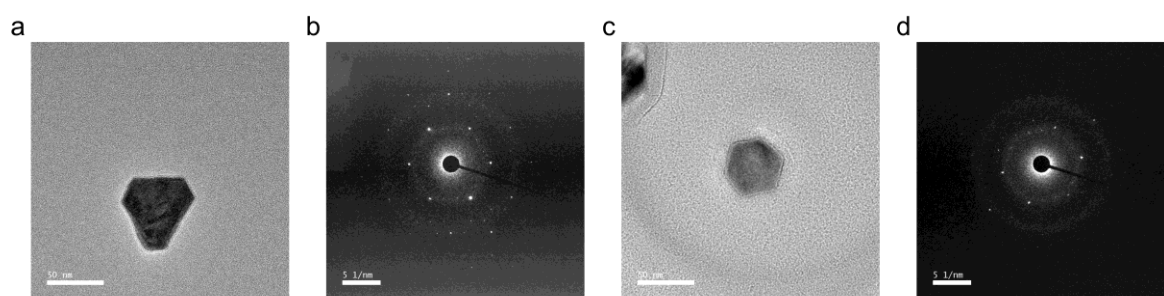

**Figure S6.** Representative Ni<sub>2</sub>P morphologies: (a) Nearly triangular hexagonal platelet, (b) Single-crystal SAED pattern of (a), (c) Hexagonal platelet-type particle, (d) Single-crystal SAED pattern of (c).

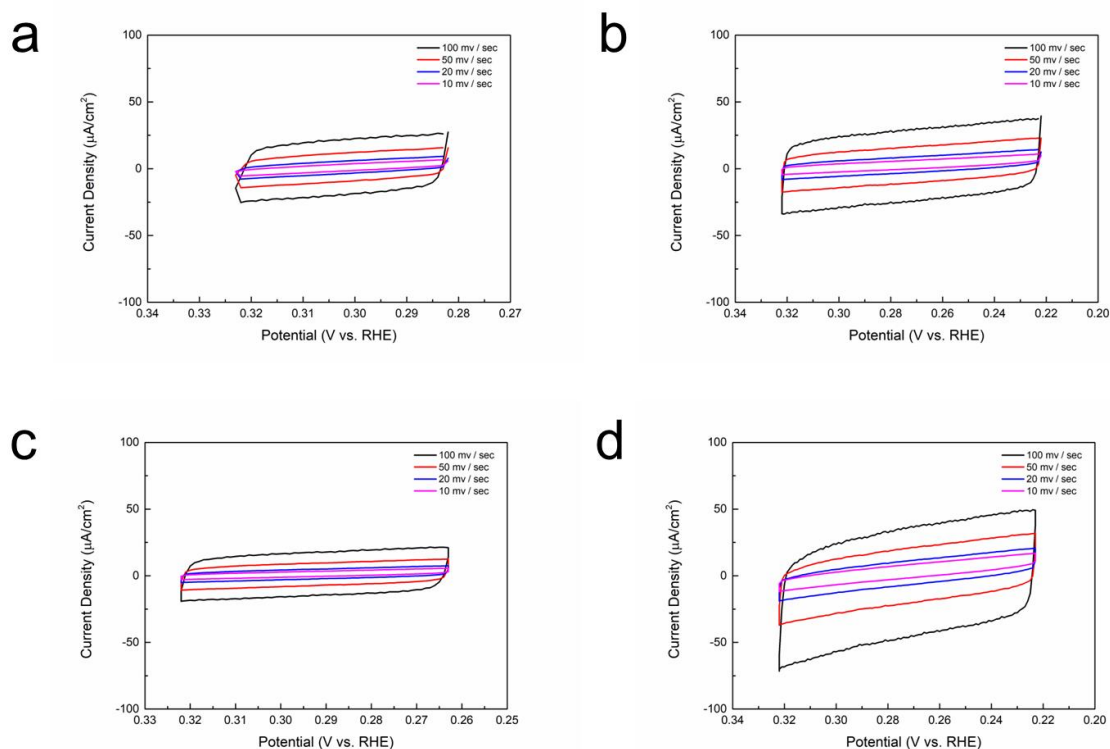

**Figure S7.** Non-Faradaic capacitance plots at various scan rates for  $\text{H}_2\text{SO}_4$  solution (a) HER rod, (b) HER Bundle, (c) OER rod, (d) OER Bundle

These data were used in computing the electrochemical surface area (ECSA) values for the different samples using the formula  $\text{ECSA} = C_{\text{dl}}/C_s$ , where  $C_s$  is the specific capacitance. A  $C_s$  value of  $0.04 \text{ mF}/\text{cm}^2$  was referenced from previous studies.<sup>4</sup>

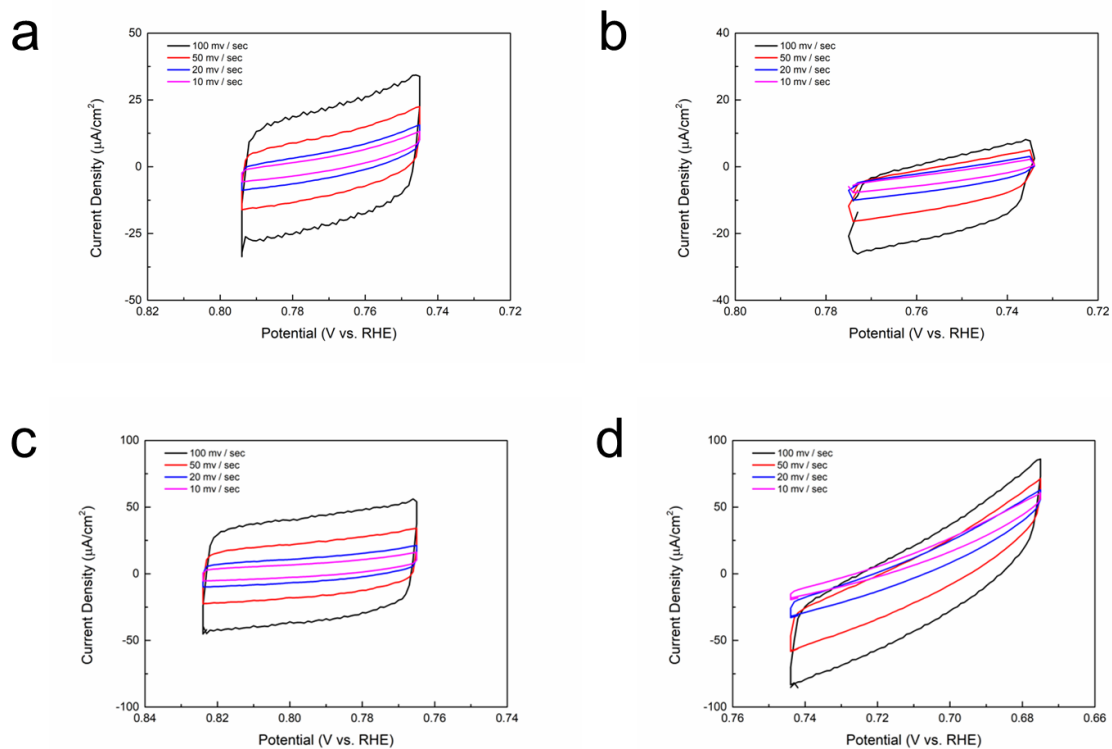

**Figure S8.** Non-Faradaic capacitance plots at various scan rates for 1M KOH solution (a) HER rod, (b) HER Bundle, (c) OER rod, (d) OER Bundle

## References

- (1) N. Shida, J. A. Buss and T. Agapie, *Chem. Commun.*, 2018, 54, 767–770.
- (2) C. Wang, Y. Wu, Z. Zhou, J. Wang, S. Pei and S. Liu, *International Journal of Hydrogen Energy*, 2022, 47, 40849–40859.
- (3) Z. Lu and L. Sepunaru, *Electrochimica Acta*, 2020, 363, 137167.
- (4) S. I. Mutinda, T. N. Batugedara, B. Brown and S. L. Brock, *ChemCatChem*, 2021, **13**, 4111–4119.
